# Supplementary material
Source: PubMed Central journal article supplement (PMC6264908)

**Figure S1** A hematoxylin and eosin stained section of the duodenum of ECA\_UCD\_AH1 demonstrating the eosinophilic and lymphocytic infiltration observed in both horses. The lamina propria and submucosa are expanded by a cellular infiltrate (a), composed of predominantly lymphocytes and plasma cells in the lamina propria (b) and by eosinophils in the submucosa (c).

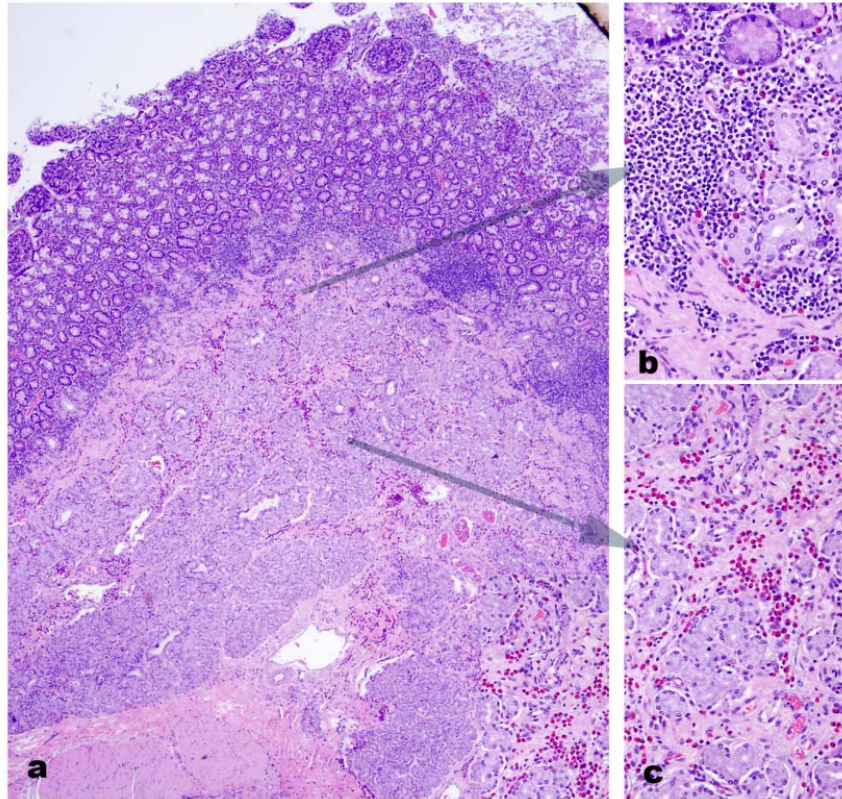

Supplement: NIHMS985333-supplement-Supp_figS1.pdf [file NIHMS985333-supplement-Supp_figS1.pdf]
