# Supplementary material
Source: PubMed Central journal article supplement (PMC6264908)
Supplement: NIHMS985333-supplement-Supp_TableS1.pdf [file NIHMS985333-supplement-Supp_TableS1.pdf]

**Table S1** Results from clinical examinations and phenotyping of ECA\_UCD\_AH1 and ECA\_UCD\_AH2. NSF denotes no significant findings during the clinical examinations. If a test was not performed on one of the two animals, it is represented by an NA. Asterisk denotes video available of lameness exam.

| <u>Test</u>          | <u>ECA_UCD_AH1</u>   | <u>ECA_UCD_AH2</u>              |
|----------------------|----------------------|---------------------------------|
| Pedigree             | Obtained             | Obtained                        |
| Serum Biochemistry   | NSF                  | Hypokalemic – Normal on recheck |
| Complete Blood Count | NSF                  | Lymphopenia – Normal on recheck |
| Neurologic Exam      | NSF                  | NSF                             |
| Lameness Exam        | Grade 2/5 right hind | Bilateral grade 2/5 forelimbs*  |
| Ophthalmic Exam      | NSF                  | NSF                             |
| CSF Cytology Report  | NA                   | NSF                             |
| Karyotype            | NSF                  | NSF                             |
| Coat Color           | Chestnut             | Bay                             |
| Markings             | Blaze                | None                            |
| Other Abnormalities  | None                 | Brachygnathia                   |
| Weight               | 462.5 kilograms      | 510 kilograms                   |
| Height               | 15.2 hands           | 15.2 hands                      |
| Sample Accession     | SAMEA104728862       | SAMEA104728877                  |
