# Supplementary material
Source: PubMed Central journal article supplement (PMC6264908)
Supplement: NIHMS985333-supplement-Supp_TableS2.pdf [file NIHMS985333-supplement-Supp_TableS2.pdf]

**Table S2** Description of cryopreserved cells from cell culture

| <u>Horse ID</u> | <u>Cell Type</u>        | <u>Passage</u> | <u>Cells/vial</u> | <u>Vials</u> |
|-----------------|-------------------------|----------------|-------------------|--------------|
| ECA_UCD_AH1     | Dermal Fibroblasts      | P3             | 2 million         | 14           |
| ECA_UCD_AH1     | Dermal Fibroblasts      | P4             | 1 million         | 3            |
| ECA_UCD_AH1     | Epidermal Keratinocytes | P2             | 2 million         | 8            |
| ECA_UCD_AH1     | Epidermal Keratinocytes | P3             | 2 million         | 5            |
| ECA_UCD_AH2     | Dermal Fibroblasts      | P3             | 2 million         | 8            |
| ECA_UCD_AH2     | Dermal Fibroblasts      | P4             | 2 million         | 13           |
| ECA_UCD_AH2     | Epidermal Keratinocytes | P4             | 2 million         | 14           |
