# Supplementary material
Source: PubMed Central journal article supplement (PMC6264908)
Supplement: NIHMS985333-supplement-Supp_TableS3.pdf [file NIHMS985333-supplement-Supp_TableS3.pdf]

**Table S3** Detailed description of the histopathologic report for every tissue from each individual horse.

| <u>Tissue</u>                | <u>ECA UCD AH1</u>                        | <u>ECA UCD AH2</u>                                                                                                     |
|------------------------------|-------------------------------------------|------------------------------------------------------------------------------------------------------------------------|
| Skin Mid Neck                | WNL                                       | Not sampled                                                                                                            |
| Skin Over Back               | WNL                                       | WNL                                                                                                                    |
| Loin & Gluteal Adipose       | WNL                                       | WNL                                                                                                                    |
| Gluteal Muscle               | WNL                                       | WNL                                                                                                                    |
| Sacrocaudalis Muscle         | WNL                                       | Minimal increase of perivascular cells                                                                                 |
| Longissimus Dorsi Muscle     | Few perivascular lymphocytes              | WNL                                                                                                                    |
| Bone Marrow                  | WNL                                       | WNL                                                                                                                    |
| Right Front Coronary Band    | WNL                                       | WNL                                                                                                                    |
| Right Front & Hind Lamina    | WNL                                       | WNL                                                                                                                    |
| Right Hind Stifle Cartilage  | WNL                                       | WNL                                                                                                                    |
| Right Hind Suspensory & SDFT | WNL                                       | WNL                                                                                                                    |
| Left Front SDFT              | WNL                                       | Small focus of lymphocytes in tendon sheath                                                                            |
| Left Front Suspensory        | WNL                                       | Mild perivascular lymphocytic infiltrates                                                                              |
| Left Front & Right Hind DDFT | WNL                                       | WNL                                                                                                                    |
| Sciatic Nerve                | WNL                                       | WNL                                                                                                                    |
| Liver                        | One small focus of lymphocytes, portal    | Hemosiderosis in kupffer cells, variable pigment in hepatocytes, minimal random neutrophilic and lymphocytic hepatitis |
| Spleen                       | Congestions, hemosiderosis (+)            | Active white pulp, mild hemosiderosis                                                                                  |
| Adrenal Cortex & Medulla     | WNL                                       | WNL                                                                                                                    |
| Kidney Cortex                | Minimal multifocal interstitial nephritis | WNL                                                                                                                    |
| Kidney Medulla               | Minimal multifocal interstitial nephritis | Mild multifocal lymphoplasmacellular nephritis                                                                         |
| Larynx                       | WNL                                       | WNL                                                                                                                    |
| CAD Muscle                   | WNL                                       | Focal minimal round cell infiltrates                                                                                   |
| Pancreas                     | WNL                                       | WNL                                                                                                                    |
| Thyroids                     | WNL                                       | WNL                                                                                                                    |
| Lymph node                   | WNL                                       | Mild follicular and paracortical hyperplasia                                                                           |

| <u>Tissue</u>                      | <u>ECA UCD AH1</u>                                                                                                                               | <u>ECA UCD AH2</u>                                                                                                                                                                                                                                                                                                                                                                               |
|------------------------------------|--------------------------------------------------------------------------------------------------------------------------------------------------|--------------------------------------------------------------------------------------------------------------------------------------------------------------------------------------------------------------------------------------------------------------------------------------------------------------------------------------------------------------------------------------------------|
| Bronchiolar/Mediastinal Lymph Node | WNL                                                                                                                                              | Follicular and paracortical hyperplasia with mild eosinophilic infiltrates; focal mineralized granuloma                                                                                                                                                                                                                                                                                          |
| Left Lung                          | Peribronchiolar eosinophils + and lymphocytes/plasma cells (+); circulating eosinophils                                                          | Moderate peribronchiolar eosinophilic and lymphocytic infiltrates with marked contracted peribronchiolar muscles leading to narrowing of bronchioles, mild circulating eosinophilia                                                                                                                                                                                                              |
| Lung Nodule                        | Locally extensive eosinophilic and lymphoplasmacellular pneumonia with extension into lobular septae and peribronchiolar                         | Multifocal extensive interstitial eosinophilic and lymphocytic pneumonia with marked protein rich edema centered around an area of eosinophilic arteritis with periarterial hemorrhage (no parasites noted); moderate peribronchiolar eosinophilic and lymphocytic infiltrates with marked contracted peribronchiolar muscles leading to narrowing of bronchioles; mild circulating eosinophilia |
| Heart Left Atrium                  | WNL                                                                                                                                              | Mild perivascular lymphoid and plasma cellular infiltrates in epicardial fat; minimal perivascular lymphoid infiltrate in myocardium                                                                                                                                                                                                                                                             |
| Heart Left Ventricle               | WNL                                                                                                                                              | Minimal perivascular lymphoid infiltrate myocardium                                                                                                                                                                                                                                                                                                                                              |
| Heart Right Atrium and Ventricle   | WNL                                                                                                                                              | Mild perivascular lymphoid and plasma cellular infiltrates in epicardial fat; minimal sprinkling of lymphocytes                                                                                                                                                                                                                                                                                  |
| Septum                             | WNL                                                                                                                                              | Minimal sprinkling of lymphocytes                                                                                                                                                                                                                                                                                                                                                                |
| Mitral Valve                       | WNL                                                                                                                                              | Minimal lymphoid infiltrates                                                                                                                                                                                                                                                                                                                                                                     |
| Tricuspid Valve                    | Insertion site small focus of perivascular lymphocytes                                                                                           | WNL                                                                                                                                                                                                                                                                                                                                                                                              |
| Aortic Valve                       | Mild lymphoplasmacellular infiltrate                                                                                                             | WNL                                                                                                                                                                                                                                                                                                                                                                                              |
| Pulmonic Valve                     | Insertion site small focus of perivascular lymphocytes                                                                                           | Rare lymphocytes                                                                                                                                                                                                                                                                                                                                                                                 |
| Trachea                            | Minimal subepithelial lymphocytic, plasmacytic infiltrates                                                                                       | WNL                                                                                                                                                                                                                                                                                                                                                                                              |
| Tongue                             | WNL                                                                                                                                              | Mild perivascular lymphoid infiltrates in lamina propria                                                                                                                                                                                                                                                                                                                                         |
| Epiglottis                         | WNL                                                                                                                                              | WNL                                                                                                                                                                                                                                                                                                                                                                                              |
| Esophagus                          | WNL                                                                                                                                              | Small focus of minimal perivascular intramuscular lymphoid infiltrates                                                                                                                                                                                                                                                                                                                           |
| Stomach                            | Minimal eosinophilic and lymphocytic infiltrate margo plicatus; glandular portion: lymphoplasmacytic infiltrates in lamina propria and submucosa | Mild lymphocytic and eosinophilic gastric along margo plicatus                                                                                                                                                                                                                                                                                                                                   |
| Duodenum                           | Eosinophilic +, lymphocytic (+) infiltrate in lamina propria and submucosa                                                                       | Lymphocytes and plasma cells ++ lamina propria, intraepithelial lymphocytes, occasionally in aggregates                                                                                                                                                                                                                                                                                          |

| <u>Tissue</u>                          | <u>ECA UCD AH1</u>                                                                                   | <u>ECA UCD AH2</u>                                                                             |
|----------------------------------------|------------------------------------------------------------------------------------------------------|------------------------------------------------------------------------------------------------|
| Jejunum                                | Eosinophilic ++, lymphocytic + infiltrate in lamina propria and submucosa                            | Not sampled                                                                                    |
| Ileum                                  | Eosinophilic ++, lymphocytic + infiltrate in lamina propria and submucosa; active peyer's patches    | Lymphocytes + and eosinophils +, lamina propria and submucosa                                  |
| Cecum                                  | Eosinophilic ++, lymphocytic + infiltrate in lamina propria and submucosa                            | Lymphocytes ++ and eosinophils ++, lamina propria and submucosa                                |
| Right Ventral Colon                    | Eosinophilic ++, lymphocytic + infiltrate in lamina propria and submucosa                            | Lymphocytes ++ and eosinophils ++, lamina propria and submucosa                                |
| Left Ventral Colon                     | Eosinophilic +++, lymphocytic + infiltrate in lamina propria and submucosa                           | Lymphocytes ++ and eosinophils ++, lamina propria and submucosa, mild lymphoid hyperplasia     |
| Left Dorsal Colon                      | Eosinophilic ++, lymphocytic + infiltrate in lamina propria and submucosa                            | Lymphocytes ++ and eosinophils ++, lamina propria and submucosa, Moderate lymphoid hyperplasia |
| Right Dorsal Colon                     | Eosinophilic +++, lymphocytic/plasma cell +++ infiltrate in lamina propria and submucosa             | Lymphocytes ++ and eosinophils ++, lamina propria and submucosa, moderate lymphoid hyperplasia |
| Small Colon                            | Eosinophilic ++, lymphocytic/plasma cell +, infiltrate in lamina propria and submucosa               | Lymphocytes + and eosinophils +, lamina propria and submucosa                                  |
| Ocular globe                           | Mild lymphocytic conjunctivitis; multifocal mineralization of the posterior area of the ocular globe | Multifocal mineralization of sclera                                                            |
| Frontal Cortex                         | Minimal focal gliosis                                                                                | WNL                                                                                            |
| Parietal & Temporal Cortex             | WNL                                                                                                  | WNL                                                                                            |
| Occipital Cortex                       | WNL                                                                                                  | Some peracute hemorrhages (agonal)                                                             |
| Pituitary                              | WNL                                                                                                  | WNL                                                                                            |
| Cerebellum Vermis & Lateral Hemisphere | WNL                                                                                                  | WNL                                                                                            |
| Pons                                   | WNL                                                                                                  | WNL                                                                                            |
| Thalamus                               | WNL                                                                                                  | WNL                                                                                            |
| Hypothalamus                           | WNL                                                                                                  | WNL                                                                                            |
| Dura Mater                             | Moderate multifocal mineralization                                                                   | Marked mineralization                                                                          |
| Corpus Callosum                        | WNL                                                                                                  | WNL                                                                                            |
| C 1                                    | WNL                                                                                                  | WNL                                                                                            |
| C 5/6                                  | WNL                                                                                                  | Marked artifacts                                                                               |

| <u>Tissue</u>    | <u>ECA UCD AH1</u>                                               | <u>ECA UCD AH2</u>                                                   |
|------------------|------------------------------------------------------------------|----------------------------------------------------------------------|
| T 7/9 & L 1      | Minimal gliosis                                                  | WNL                                                                  |
| L 6              | WNL                                                              | WNL                                                                  |
| Dorsal Ganglia   | WNL - adjacent fibrous tissue has a few perivascular lymphocytes | Not sampled                                                          |
| Cervical Ganglia | Nerve but no ganglion                                            | Nerve but no ganglion                                                |
| Urinary Bladder  | Few lymphocytes around one vessel in lamina propria              | Mucosa not on the slide; minimal lymphocytes perivascular subserosal |
| Oviduct & Uterus | WNL                                                              | WNL                                                                  |
| Left Ovary       | WNL                                                              | WNL                                                                  |
| Right Ovary      | Large follicle, part of a CL                                     | WNL                                                                  |
| Cervix           | WNL                                                              | Microhemorrhage lamina propria                                       |
| Vagina           | WNL                                                              | Minimal superficial lymphoid infiltrate lamina propria               |
| Mammary Gland    | WNL                                                              | WNL                                                                  |

SDFT = Superficial Digital Flexor Tendon

DDFT = Deep Digital Flexor Tendon

WNL = Within Normal Limits
